# Supplementary material for: Mast cell-derived TSLP triggers an allergic response to induce autophagy, thereby inhibiting the development of melanoma
Source: Research Square preprint supplement (doi:10.21203/rs.3.rs-3070760/v1), 2025-03-26
Supplement: Supplementary file 1 [file 1f27d6217af38578865828e6.docx]

**Mast cell-derived TSLP triggers an allergic response to induce autophagy, thereby inhibiting the development of melanoma**

**Materials and** **Methods**

**Mice and cell lines**

Male C57BL/6 mice (6 weeks old) and BALB/c nude mice (immunodeficient mice, 6 weeks old) were obtained from Dae-Han Experimental Animal Center (Eumsung, Republic of Korea). Mice were housed in a controlled environment with a 12:12-h light-dark cycle. All experimental procedures were conducted in accordance with current laws and guidelines for the care and use of laboratory animals approved by the Animal Ethics Committee of Kyung Hee University [KHUASP (SE)-17-157].

Mouse melanoma B16F10 cell and human B cell line U266 cells were purchased from ATCC. B16F10 cells were grown in Dulbecco’s Modified Eagle’s medium (Gibco BRL, Grand Island, NY, USA) and U266 cells were grown in RPMI-1640 medium supplemented with 10% heat-inactivated fetal bovine serum (Gibco BRL), 2 mM glutamine, 100 U/ml penicillin, and 100 mg/ml streptomycin (Sigma, St. Louis, MO, USA). Cells were routinely tested for Mycoplasma contamination using a polymerase chain reaction (PCR)-based Mycoplasma Detection Kit (iNtRON Biotech Inc., Seongnam, Republic of Korea).

**Tumor models**

C57BL/6 and BALB/c nude mice were injected subcutaneous (s.c.) with 3 × 105 cells into the right or flank of mice. The time of mouse death was recorded and used to calculate the survival rate. Tumor growth was measured every 2 days after tumor inoculation using digital calipers. Tumor volume (V) was calculated by the formula; V = (length × width2)/2. There was no significant change in body weight between groups. For protein extraction, tumor samples were cut into pieces and immediately frozen in liquid nitrogen. For histological analysis, the remaining tumor tissues were fixed in 10% formalin.

To investigate the role of allergic reaction on melanoma development, C57BL/6N mice (n = 10 per group) were intraperitoneally (i.p.) or orally administrated with phosphate-buffered saline (PBS, control), compound 48/80 (5 mg/kg, mast cell degranulator, Sigma, St. Louis, MO, USA), IgE (1 mg/kg, Sigma), or cisplatin (1 mg/kg, anti-cancer drug, Sigma) every two days for 22 days. Melanoma growth was monitored over time. Through preliminary research, the concentration of compound 48/80 that was chosen was 5 mg/kg, which had no effect on the mortality brought on by anaphylactic shock in animal model.

To down-regulate TSLP levels, C57BL/6N mice (n = 10 per group) were subcutaneously injected with **scramble control siRNA or TSLP-specific siRNA (**TSLP SMARTpool, Dharmacon Inc., Chicago, IL, USA) **mixed with atelocollagen** (Atelogene *in vivo* siRNA transcription kit, Cosmo Bio Co., LTD, Japan) 48 h **before i.p.** injection with PBS or compound 48/80 (5 mg/kg) every two days for 22 days. Melanoma growth was monitored over time.

To investigate the role of TSLP on melanoma development, C57BL/6N mice (n = 10 per group) were given an i.p. injection ofPBS or recombinant (r) TSLP (2 μg, R & D Systems, Minneapolis, MN, USA) every two days for 22 days. Melanoma growth was monitored over time.

To investigate the role of TLP on melanoma development of immunodeficient mice, BALB/c nude mice (immunodeficient mice, n = 10 per group) were given an i.p. injection ofPBS or rTSLP (2 μg, R & D Systems) every two days for 26 days. Melanoma growth was monitored over time. On day 26, the immobility time of the forced swimming test (FST) was assessed.

**Quantitative real-time-PCR (qRT-PCR)**

RNA of melanoma tissue or cell was extracted usingEasy-BLUETM RNA extraction kit (iNtRON Biotech Inc.). Reverse transcription and real-time PCR was conducted using cDNA synthesis kit (Bioneer Corporation, Daejeon, Republic of Korea) and Power SYBR Green PCR Master Mix using an ABI StepOne real-time PCR System (Applied Biosystems, Foster City, CA, USA) with the following primer pairs for the indicated genes: mouse TSLPR (5’GGGCCATGGTGTTTAAGGCTA3’ and 5’GAGCAGCGTCACATTCCAAG3’), mouse Dct2 (5’TCCTCCACTCTTTTACAGACG3’ and 5’ATTCGGTTGTGACCAATGGG3’), mouse gp100 (5’AGCACCTGGAACCACATCTA3’ and 5’CCAGAGGGCGTTTGTGTAGT3’), mouse LAMP1 (5′GCAAGGCGCTCGCCCTCAAT3′ and 5′GCCCGCGTGACTCCTCTTCC3′), mouse LAMP2 (5′AGCAGGTGGTTTCCGTGTCTCG3′ and 5′AGGGCTGCTCCCACCGCTAT3′), and mouse GAPDH (5’GGCAAATTCAACGGCACA3’ and 5’GTTAGTGGGGTCTCGCTCCTG3’). Gene expression was quantified relative to the expression of GAPDH. Fold change in gene expression was calculated using the ΔΔCT method. Reverse transcription PCR was performed with the following primers for mouse TSLPR (5’GGCAGGGGAATAACCGCGAGT3’ and 5’GAAGTGACACCAGCGCCGGAC3’), mouse IL-7Rα (5’TTAAAGCCGAGGCTCCCTCTGACC3’ and 5’TTGGACTCCACTCGCTCCAGAAGC3’), and GAPDH (5’TTCACCACCATGGAGAAGGC3’ and 5’GGCATGGACTGTGGTCATGA3’).The annealing temperature was 60°C for TSLPR, IL-7R α, and GAPDH.

**Caspase assay**

To estimate the apoptosis, activities of caspases were measured using colorimetric caspase activity assay kits (R & D Systems), according to the protocol of the manufacturer. In brief, the melanoma tissues and cells were lysed in the lysis buffer provided in the kit. The protein extracts (150 μg) assayed by bicinchoninic acid (Sigma) were incubated with the supplied reaction buffer containing 1 mM DTT with or without substrates (Asp-Glu-Val-Asp for caspase-3; Ile-Glu-Thr-Asp for caspase-8; Leu-Glu-His-Asp for caspase-9) labeled with p-nitroaniline at 37°C for 4 h. The optical density was measured at 405 nm wavelength using ELISA reader.

**Immunoblotting**

Western blot analysis was conducted as described previously using total protein lysates from either cell or melanoma tissue (Nam et al., 2019). Membranes with transferred proteins were incubated overnight with the following antibodies: The primary antibodies were used: anti-LC3 (Santa Cruz Biotechnology, CA, USA), anti-Beclin-1 (Santa Cruz Biotechnology), anti-JAK1 (Santa Cruz Biotechnology), anti-phosphorylated (p) JAK1 (Cell Signaling Technology, MA, USA), anti-JAK2 (Santa Cruz Biotechnology), anti-pJAK2 (Cell Signaling Technology, MA, USA), anti-STAT5 (Santa Cruz Biotechnology), anti-pSTAT5 (Santa Cruz Biotechnology), anti-class III PI3K (Cell Signaling Technology), anti-Atg5 (Santa Cruz Biotechnology), anti-p62 (Cell Signaling Technology), and anti-GAPDH (Santa Cruz Biotechnology). The next day, wash the membranes five times with PBS containing Tween 20 then incubated with horseradish peroxidase conjugated secondary antibodies (Santa Cruz Biotechnology). Proteins were detected using enhanced chemiluminescence solution (DoGenBio Co., Seoul, Korea).

**Immunofluorescence staining**

Melanoma tissue samples were fixed with 10% formaldehyde in PBS, embedded in optimal cutting temperature compound, and the sections were incubated with anti-melan A (Cell Signaling Technology, MA, USA), anti-LC3 (Santa Cruz Biotechnology), anti-TSLP neutralizing (Anti-TSLP, R & D Systems), anti-tryptase (Santa Cruz Biotechnology), rat IgG-FITC (**Abcam, Cambridge, MA, USA**), rabbit IgG-TRITC (**Abcam, Cambridge, MA, USA**), or mouse IgG-FITC antibodies (Santa Cruz Biotechnology). The mounting medium containing 4', 6-diamidino-2-phenylindole (Sigma-Aldrich Co.) was used to counterstain DNA. Confocal microscopic images were visualized under a Fluoview FV10i confocal microscope (Olympus Co., Tokyo, Japan).

**Transmission electron microscopy (TEM)**

For TEM, melanoma tissue of mice was fixed with 2% paraformaldehyde, 0.05 M sodium cacodylate buffer, 2% glutaraldehyde, and pH 7.2 PBS at 4°C. The samples were then postfixed in 1% osmium tetroxide, dehydrated through a graded series of ethanol, and placed in Embed 812. Ultrathin sections were cut in an ultramicrotome (MT-X, RMC, Tucson, AZ, USA), stained with uranyl acetate and Reynolds’ lead citrate, and examined using a Libra 120 TEM (Carl Zeiss Inc., Weimar, Germany).

**Histamine assay**

**Histamine levels were measured u**sing a histamine assay kit (Oxford Biomedical Research, Oxford, MI, USA). The fluorescent intensity was measured at 460 nm (excitation at 355 nm) using a spectrofluorometer.

**Enzyme-linked immunosorbent assay (ELISA)**

Cytokine levelswere analyzed following the manufacturer’s instruction (R&D Systems, Minneapolis, Minnesota, USA; BD Biosciences, San Diego, CA, USA).

**Mast cell staining**

Melanoma tissue samples were immediately fixed with 10% formaldehyde and embedded in paraffin. Next, samples were cut into 4 µm thick sections that were stained with alcian blue and safranin O after dewaxing and dehydration. Staining procedure was performed according to previous study (Nam et al., 2019).

**Competitive ELISA**

Competitive ELSIA was performed using a programmed cell death protein 1 (PD-1)/ programmed cell death ligand 1 (PD-L1). Inhibitor Screening Assay Kit, according to the supplier’s instructions. An aliquot of 1 μg/ml recombinant human PD-L1 (BPS Bioscience, #71104) were coated onto a 96-well plate overnight. Plates were washed with phosphate-buffered saline (PBS) containing 0.1% Tween (PBS-T), blocked for 1 h at room temperature with PBS-T containing 2% (w/v) bovine serum albumen, and washed again. After washing, vehicle or test samples were added, and the reaction continued for 1 h. As a positive control, PD-L1 inhibitor C1 was used. Biotinylated hPD–1 (BPS Bioscience, #71109) was added to each well, and plates were incubated for 2 h at room temperature. After three washes with PBS-T, diluted streptavidin-horseradish peroxidase (HRP) was added to each well, and plates were reacted for 1 h while shaking at low speed. After the reaction, plates were washed three times with PBS-T, and HRP substrates A and B were added. Relative chemiluminescence was measured on a SpectraMax L Luminometer (Molecular Devices, San Jose, California, USA) and expressed as the relative binding activity. The results were normalized to the relative percentage of the vehicle control group. All results are presented as the mean of three independent biological replicates.

**Blood biochemical parameters**

After the experiment, blood samples were collected from the animals in all groups and the serum was prepared by centrifugation at 3,000 × *g* at 4°C for 10 min. A DRI CHEM NX500 analyzer (Fujifilm, Tokyo, Japan) determined the contents of lactate dehydrogenase (LDH), blood urea nitrogen (BUN), alanine transaminase (ALT), aspartate aminotransferase (AST), creatine kinase (CK), glucose, and C-reactive protein (CRP).

**Single-cell RNA sequencing analysis**

Single-cell transcriptomic amplification and library preparation were performed by ROKIT GENOMICS Inc. (Seoul, Republic of Korea) using BD Rhapsody System (BD Biosciences) according to manufacturer’s instructions. For further details regarding the materials and methods, please refer to the supplementary information.Fresh specimens were immediately stored in the Tissue storage solution (miltenyi biotech, cat no. 130-100-008) at 4°C. Prior to dissociation, tissues were washed with Phosphate buffered saline (PBS) and minced into 1–2 mm pieces. The tissue pieces were then dissociated using the Tumor Dissociation Kit, mouse (miltenyi biotech, cat no. 130-096-730) and gentle MACS dissociator (miltenyi biotech), following the manufacturer’s instructions. Following dissociation, cell suspension was sequentially passed through 70 and 30 μm strainer to separate cells from cell debris and undigested tissue chunks. The cell suspensions were pelleted by centrifuging at 300 × *g*, 4°C, for 5 min and then erythrocytes were removed using red blood cell lysis solution (Miltenyi biotech, cat no. 130-094-183) on 25°C for 10 minutes. Cells washed 2 times with cold Ca2+ and Mg2+ free 0.04 % BSA/PBS at 300 × *g* for 5min at 4°C. Samples were gently resuspended in stain buffer (BD Biosciences, cat no. 554656), and then counted with a LUNA-FX7™ Automated Fluorescence Cell Counter (logos biosystems) using an acridine orange and propidium iodide staining (logos biosystems, cat no. F23001). The cell viability was further assessed using the Dead cells removal Kit (Miltenyi Biotech, Cat no 130-090-101) and MS columns (miltenyi biotech, cat no. 130-042-201) according to the manufacture’s instrument.

To multiplex samples, each sample was tagged with antibody-polyadenylated DNA barcode for mouse cells (BD Biosciences, cat no. 626545). Briefly, cells were stained with multiplexing antibody for 20 min at room temperature, and then washed 3 times by using stain buffer (BD Biosciences, cat no. 554656). After final washing, samples were gently resuspended in cold sample buffer (BD Biosciences, cat no. 633731), counted with a LUNA-FX7™ Automated Fluorescence Cell Counter (logos biosystems), and then pooled.

Single cell capture was performed using BD Rhapsody Express instrument according to the manufacturer’s instrument (BD Bioscience). Briefly, pooled cells from each sample in cold sample buffer were loaded into the BD Rhapsody cartridge (BD Biosciences, cat no. 633731). After cells separation, cell barcode-magnetic beads were loaded into the cartridge. Cells were lysed and the mRNA capture bead were retrieved. cDNA synthesis and Exonuclease I treatment were performed on the mRNA capture beads using BD Rhapsody cDNA kit (BD, cat no. 633773).

According to the ‘mRNA Whole Transcriptome Analysis and Sample Tag Library Preparation’ protocol (BD Bioscience), scRNA-seq libraries were constructed using BD Rhapsody Whole transcriptome analysis (WTA) amplification kit (BD, cat no. 633801). Briefly, for WTA library, cDNA was sequentially subjected to the random priming and extension (RPE), RPE amplification, and index PCR. And for sample tag library, cDNA was sequentially subjected to the nested PCR (PCR 1 and PCR 2), and index PCR.

The purified WTA and Sample tag libraries were quantified using qPCR according to the qPCR Quantification Protocol Guide (KAPA), and qualified using the Agilent Technologies 4200 TapeStation (Agilent technologies). And then libraries were pooled and sequenced using NovaSeq platform (Illumina), and 150 bp paired-end reads were generated. The sequencing depth of WTA library was about 17,000 reads/cell and sample tag library was about 400 reads/cell.

**Forced swimming test (FST)**

A preliminary FST was conducted to evaluate differences between individual mice on day 0. On the basis of the immobility time, the mice were split into three groups. The transparent cylinder used to perform the FST has a diameter of 20 cm and a height of 40 cm. The FST lasted for 6 min in total. After a 2 min delay, the total time of immobility was timed for 4 min. On day 26, the immobility time of the last FST was assessed. After performing FST, animals were euthanized with CO2 gas and blood was taken from the heart, and the serum was then prepared by centrifugation at 3000 × *g* for 10 min at 4°C. Tumor weights were also measured. For extracting proteins, tumor samples were cut into pieces promptly frozen in liquid nitrogen. For histological investigation, the rest of the tumor fragments had been fixed in formalin at a concentration of 10%.

**Patients and samples**

Human study was approved by the Bioethics Committee of Kyung Hee University [KHSIRB-19-326(EA)]. The biospecimens for this study were provided by the Chonnam National University Hwasun Hospital, a member of the National Biobank of Korea, which is supported by the Ministry of Health, Welfare and Family Affairs. All samples derived from the National Biobank of Korea were obtained with informed consent under institutional review board-approved protocols. The biospecimens were taken from healthy volunteers (n= 10; 5 males, 5 females) and patients with melanoma (n= 10; 6 males, 4 females, stage 1 or 2 melanoma) (Supplementary Table 1).

**Differentiation of mouse bone marrow-derived mast cells (BMMCs)**

BMMCs were generated from the femoral bone marrow cells of femalemice (BALB/c) and these cells were incubated in RPMI1640 (Gibco) supplemented with 10% heat-inactivatedfetal bovine serum, 100 U/ml penicillin,100 µg/ml streptomycin, 100 µM 2-mercaptoethanol,10 mM sodium pyruvate, 10 µM MEM nonessential amino acidsolution (Invitrogen, Carlsbad, CA, USA), 100 U/ml murine IL-3 (R & D system), and 0.5 U/ml murine stem cell factor (R & D system) at 37°C in a humidified atmosphere inthe presence of 5% CO2. After 4 to 5 weeks of culturing, morethan 96% of the cells were identified as mast cells as determinedby toluidine blue staining and the fluorescence-activated cell sortinganalysis of the cell surface expression of c-kit and FcεR I. BMMCs were stimulated with phorbol 12-myristate 13-acetate plus A23187 (PMACI), IgE, or compound 48/80.

**Cytotoxicity assay**

For the cytotoxicity assay,cell death was analyzed using 3-(4,5-dimethylthiazol-2-yl)-2,5-diphenyltetrazolium bromide (MTT; Sigma). For this assay, B16F10 **cells were stimulated with TSLP (20 ng/ml),** Anti-TSLP (**20 ng/ml**), or IgG**. To inhibit the autophagy, 3-MA was treated before TSLP treatment.** MTT reagent (5 mg/ml) was added to each well and incubated at 37°C for 4 h. The insoluble formazan product was dissolved in DMSO. OD was analyzed at 562 nm wavelength using ELISA reader.

**Bromodeoxyuridine (BrdU) incorporation assay**

For the proliferation assay, BrdU incorporation into B16F10 cells was assessed using BrdU colorimetric immunoassay (Roche Diagnostics GmbH, Mannheim, Germany) following the manufacturer’s protocol. Briefly, BrdU was added, and cells were allowed to incubate for an additional 4 h. Fixed cells were incubated with anti-BrdU antibodies complex in PBS (1:100) for 90 min. OD was analyzed at 405 nm wavelength using ELISA reader.

**Flow cytometry analysis**

Apoptosis was analyzed using an Annexin V-FITC apoptosis detection kit (Sigma-Aldrich, St. Louis, MO, USA) and analysis was performed according to the manufacturer’s protocol. To stain the cells, 5 μl of Annexin V-FITC and 10 μl of propidium iodide (PI) solution was added to each suspension and incubated for 10 min at room temperature in the dark. Induction of cell death was measured using Sysmex CyFlow Ploidy Analyzer (Sysmex Partec GmbH, Gorlitz, Germany). For TSLPR analysis, cells were stained with anti-TSLPR and mouse IgG-FITC antibodies (Santa Cruz Biotechnology).

**Statistical analysis of data**

SPSS 12.0 (IBM Corp., Armonk, NY, USA) software was used for all statistical analysis.Group comparisons were conducted by independent *t*-test, one-way ANOVA followed by Tukey’s *post-hoc* test, or Mann-Whitney test, with the mean values and the standard errorof themean **(**SEM**)** calculated for each group. Kaplan–Meier survival curves were calculated using overall survival. *In vitro* studies were conducted independently at least-three experiments with duplicate. Throughout the figures, figure legends, and text the following terminology is used to denote statistical significance: #, *, ##, P < 0.05. GraphPad Prism software was used to create the graphs (version 8.0.1, GraphPad Software Inc., CA, USA).

**Extended Data Figures**

**
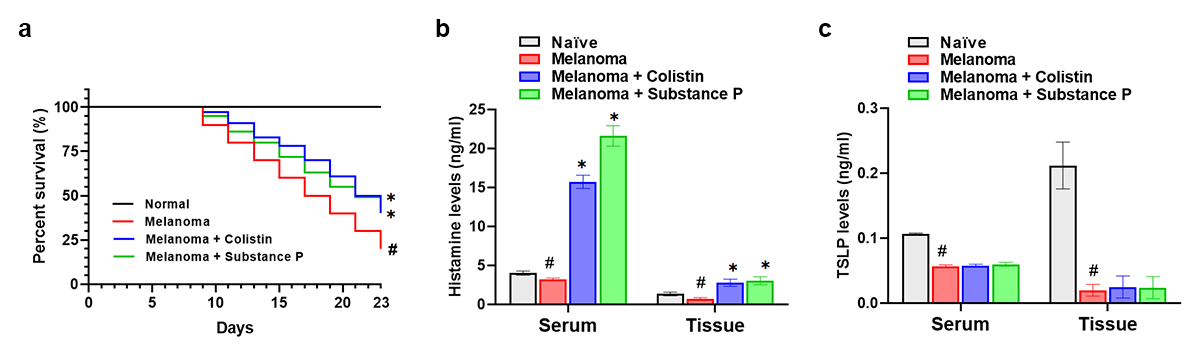
Extended Data Fig. 1 Effect of colistin and substance P in melanoma growth of tumor control mice.** C57BL/6 mice were inoculated with B16F10 cells by s.c injection of 3 × 105 cells to the right flank. The mice (n = 10 per group) were administrated with PBS, colistin (5 mg/kg), or substance P (1 mg/kg) every two days for 22 days. **a,** Survival rate. **b,** Histamine levels in serum and tissue. **c,** ELISA analysis of TSLP in serum and tissue. #P < 0.05, significantly different from the normal mice. *P < 0.05, significantly different from the B16F10-bearing mice.


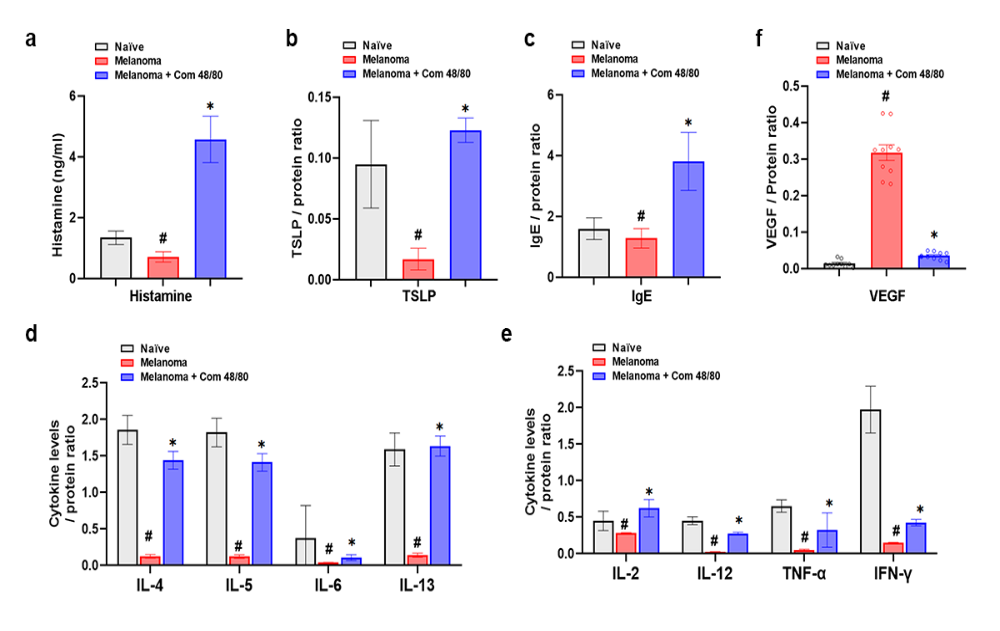


**Extended Data Fig. 2** Mast cell-mediated allergic reaction enhances levels of immunostimulatory factors in melanoma tissue of tumor control mice. The mice (n = 10 per group) were administrated with PBS or compound 48/80 (5 mg/kg) every two days for 22 days. **a,** Histamine. ELISA analysis of **b,** TSLP, **c,** IgE, **d,** IL-4, IL-5, IL-6, and IL-13, **e,** IL-2, IL-12, TNF-α, and IFN-γ in tissue. **f,** ELISA analysis of VEGF in tissue. Cytokine levels were normalized by total protein. #P < 0.05, significantly different from the normal mice. *P < 0.05, significantly different from the B16F10-bearing mice.


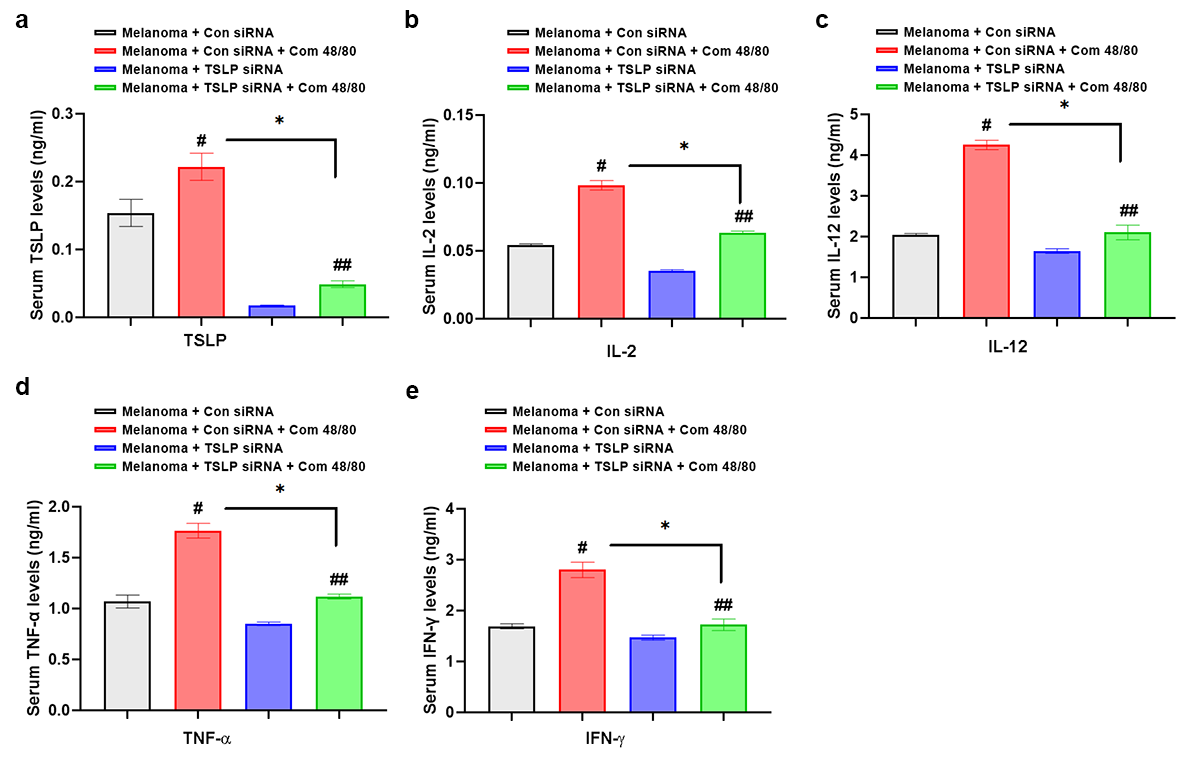


**Extended Data Fig. 3** TSLP deficiency attenuates levels of immunostimulatory factors. The mice (n = 10 per group) were given an i.v. injection of **scramble control siRNA or TSLP-specific siRNA before** administration with PBS or compound 48/80 (5 mg/kg) every two days for 22 days. ELISA analysis of **a,** TSLP, **b,** IL-2, **c,** IL-12, **d,** TNF-α, and **e,** IFN-γ. #P < 0.05; significantly different from the control siRNA tumor control mice. ##P < 0.05; significantly different from the TSLP siRNA tumor control mice. *P < 0.05; significantly different from the control siRNA com 48/80-treated mice.


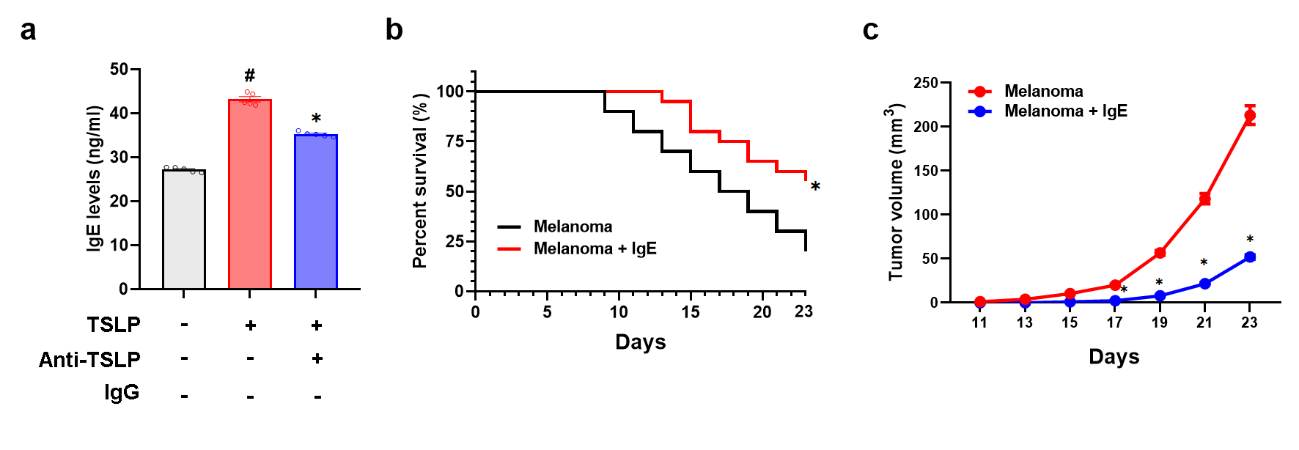


**Extended Data Fig. 4** TSLP increases production of IgE from U266 cells and IgE injection inhibits melanoma growth. **a,** U266 **cells were stimulated with TSLP (20 ng/ml) and** Anti-TSLP (**20 ng/ml**) **for 24 h. ELISA analysis of IgE.** #P< 0.05, significantly different from the unstimulated cells. *P < 0.05, significantly different from the TSLP-treated cells. C57BL/6 mice were inoculated with B16F10 cells by s.c injection of 3 × 105 cells to the right flank. The mice (n = 5 per group) were administrated with PBS or IgE (1 mg/kg) every two days for 22 days. **b,** Survival rate. **c,** Tumor volume. *P < 0.05, significantly different from the tumor control mice.

**
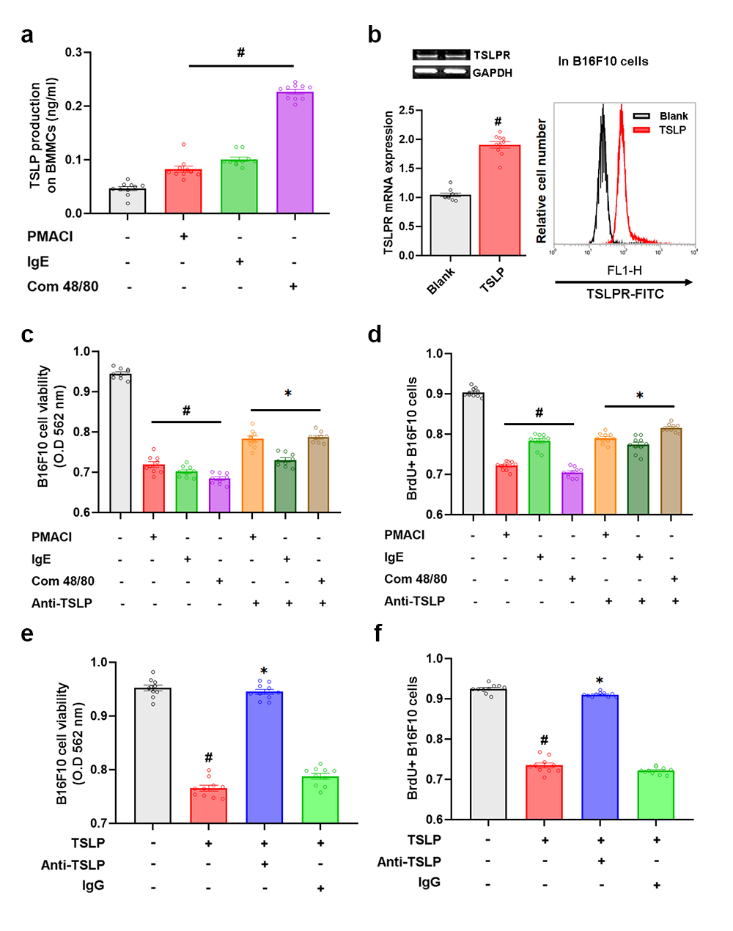
**

**Extended Data Fig. 5** Mast cell-derivedTSLP diminishes viability and growth of B16F10 cell. **a,** BMMCs were stimulated with PMACI, IgE, or Com 48/80 for 24 h. ELISA analysis of TSLP. **b,** B16F10cells were stimulated with TSLP (20 ng/ml) for 24 h or 48 h. Left, RT-PCR and qRT-PCR analysis of TSLPR mRNA expression; right, FACS analysis of TSLPR. BMMCs were stimulated with PMACI, IgE, or Com 48/80 for 24 h. B16F10 cells were incubated with activated BMMCs culture supernatants and Anti-TSLP for 54 h. **c,** Cell viability analysis of B16F10 cells using MTT assay. **d,** Cell growth analysis of B16F10 cells using BrdU assay. B16F10cells were stimulated with TSLP (20 ng/ml), Anti-TSLP (20 ng/ml), or IgG for 48 h. **e,** Cell viability analysis of B16F10 cells using MTT assay. **f,** Cell growth analysis of B16F10 cells using BrdU assay. PMACI, PMA+A23187; IgE, IgE + antigen; Com 48/80, Compound 48/80. #P < 0.05, significantly different from the unstimulated cells. *P < 0.05, significantly different from the PMACI-, IgE-, Com 48/80-, or TSLP-treated cells.

**Extended Data Tables**

**Extended Data Table 1** Baseline characteristics for the normal and melanoma groups

| **Sample** | **Group** | **Sex profile** | **Age (y), Mean ± SD** |
| --- | --- | --- | --- |
| Serum  (n = 20) | Normal (n = 10) | 5M, 5F | 60.8 ± 3.89 |
| Melanoma (n = 10) | 6M, 4F | 53.4 ± 2.70 |

M, Male; F, Female

**Extended Data Table 2** Effects of Com 48/80 on the blood biochemical parameters

|  | ALT  (U/L) | AST  (U/L) | LDH  (U/L) | BUN  (mg/dL) | CK  (mg/dL) | Glucose  (mg/dL) | CRP  (mg/dL) |
| --- | --- | --- | --- | --- | --- | --- | --- |
| Naïve | 35.07 ± 7.72 | 253.92 ± 12.09 | 915.15 ± 50.65 | 15.94 ± 0.85 | 0.19 ± 0.01 | 107.13 ± 16.86 | 0.17 ± 0.03 |
| Melanoma | 158.03 ± 8.29# | 714.29 ± 102.04# | 22245.88 ± 42.55# | 123.82 ± 3.40# | 2.95 ± 0.14# | 414.43 ± 44.40# | 0.87± 0.05# |
| Melanoma + Com 48/80 | 86.25 ± 8.75* | 425.00 ± 60.71* | 2878.79 ± 188.40* | 58.10 ± 1.16* | 0.3 ± 0.04* | 191.33 ± 12.23* | 0.4 ± 0.0.02* |

Values are means ± SEM.#P *<* 0.05 *vs.* Naïve group. *P *<* 0.05 *vs.* Melanoma group. **Com 48/80, compound 48/80** (5 mg/kg).

**Extended Data Table 3** TSLP enhances levels of immunostimulatory cytokines in melanoma tissue of tumor control mice

| Cytokine/total protein rate | IL-4 | IL-5 | IL-13 | IL-2 | IL-12 | TNF-α | IFN-γ |
| --- | --- | --- | --- | --- | --- | --- | --- |
| Naïve | 0.65 ± 0.05 | 0.86 ± 0.06 | 0.96 ± 0.02 | 1.04 ± 0.06 | 0.36 ± 0.02 | 5.67 ± 0.3 | 4.17 ± 0.7 |
| Melanoma | 0.12 ± 0.05# | 0.22 ± 0.05# | 0.31 ± 0.01# | 0.29 ± 0.05# | 0.19 ± 0.04# | 1.52 ± 0.48# | 2.01 ± 0.4# |
| Melanoma + TSLP (2 μg) | 0.35 ± 0.06* | 0.54 ± 0.07* | 0.57 ± 0.03* | 0.63 ± 0.12* | 0.23 ± 0.06* | 2.7 ± 0.51* | 2.99 ± 0.38* |

Values are means ± SEM.#P *<* 0.05 *vs.* Naïve group. *P *<* 0.05 *vs.* Melanoma group.

**Extended Data Table 4** Effects of TSLP on the blood biochemical parameters

|  | ALT  (U/L) | AST  (U/L) | LDH  (U/L) | BUN  (mg/dL) | CK  (mg/dL) | Glucose  (mg/dL) | CRP  (mg/dL) |
| --- | --- | --- | --- | --- | --- | --- | --- |
| Naïve | 37.54 ± 5.68 | 315.66 ± 10.20 | 1133 ± 52.00 | 15.25 ± 1.55 | 0.18 ± 0.01 | 109.58 ± 14.52 | 0.16 ± 0.02 |
| Melanoma | 135.68 ± 6.52# | 819.25 ± 100.55# | 22582 ± 70.50# | 152.30 ± 10.32# | 3.28 ± 0.21# | 395.15 ± 32.54# | 0.92 ± 0.03# |
| Melanoma + TSLP (2 μg) | 98.20 ± 10.89* | 498.60 ± 21.50* | 3528 ± 200.20* | 69.20 ± 01.52* | 0.35 ± 0.01* | 215.66 ± 12.51* | 0.43 ± 0.03* |

Values are means ± SEM.#P *<* 0.05 *vs.* Naïve group. *P *<* 0.05 *vs.* Melanoma group.
